# Supplementary material
Source: PubMed Central journal article supplement (PMC10028541)
Supplement: jamainternmed-e230144-s002.pdf [file jamainternmed-e230144-s002.pdf]

## **Data Sharing Statement**

Kunicki. Six-Year Cognitive Trajectory in Older Adults Following Major Surgery and Delirium. *JAMA Intern Med*. Published March 20, 2023. doi:10.1001/jamainternmed.2023.0144

### **Data**

**Data available:** No
